# Supplementary material for: Infrared attenuated total reflection and 2D fluorescence spectroscopy for the discrimination of differently aggregated monoclonal antibodies
Source: Royal Society of Chemistry journal article supplement (doi:10.1039/c9an00424f), 2019-01-01
Supplement: c9an00424f1.pdf [file c9an00424f1.pdf]

## Supplementary information

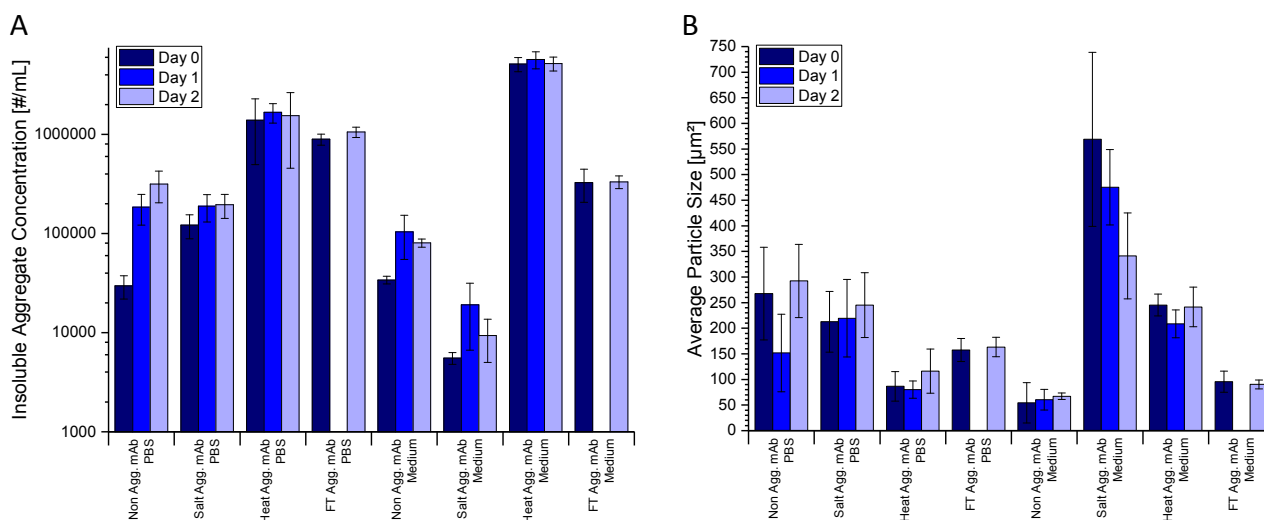

Supplement Figure 1. Non-, salt-, heat-, and freeze-thawed (FT) aggregated mAb in PBS or SFM were analyzed on day 0-2. The concentration (A) and the average size (B) of insoluble aggregates were identified by fluorescence microscopic imaging by staining the hydrophobic groups of the unfolded/denaturated proteins with 10  $\mu\text{M}$  Bis-ANS.

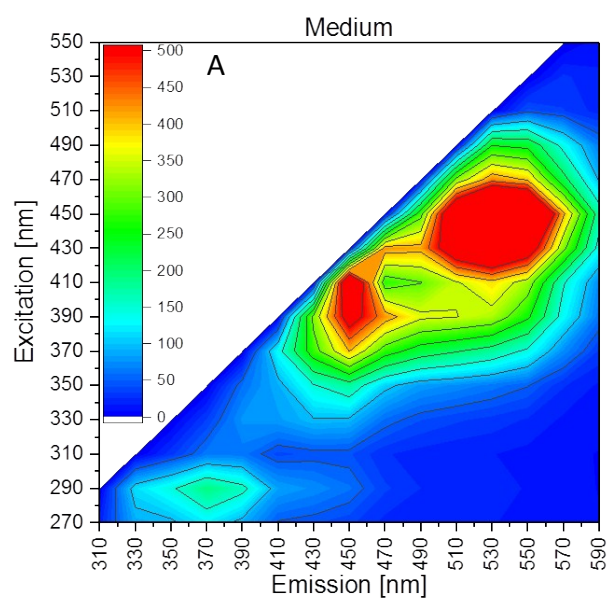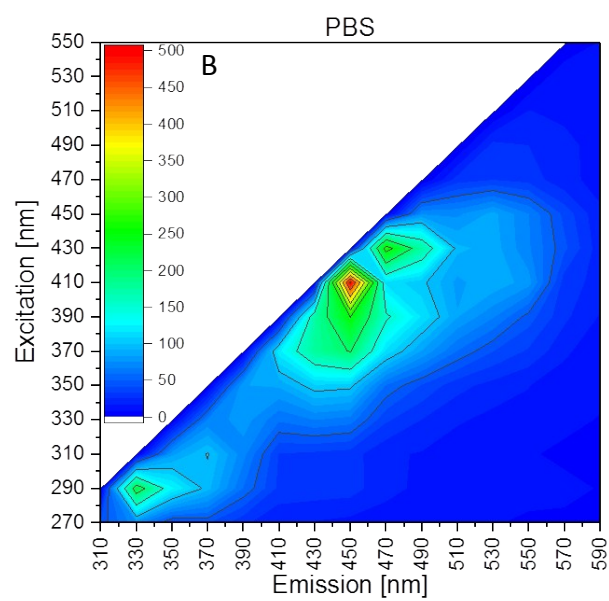

Supplement Figure 2: 2D fluorescence spectra of SFM (A) and PBS (B) used for the background subtraction of the differently aggregated mAb1 samples in the solvent matrices, respectively.
